# Supplementary material
Source: ML conference proceedings conference paper supplement (https://openreview.net/forum?id=vcJiPLeC48)

split: train

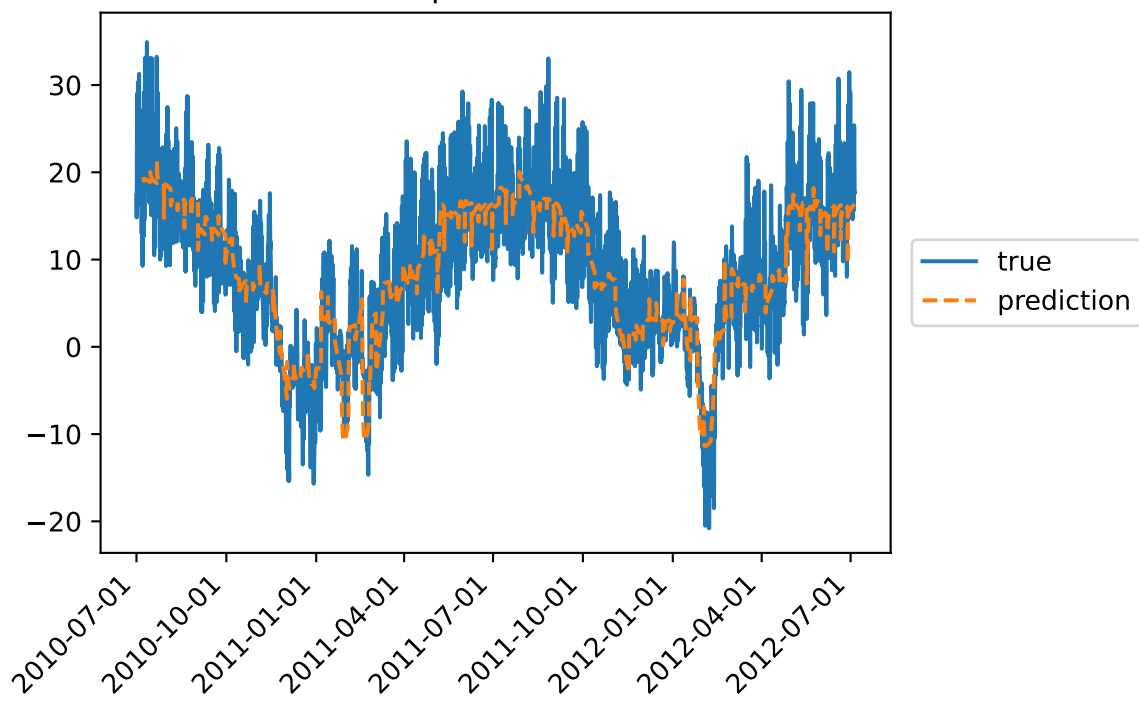

split: train

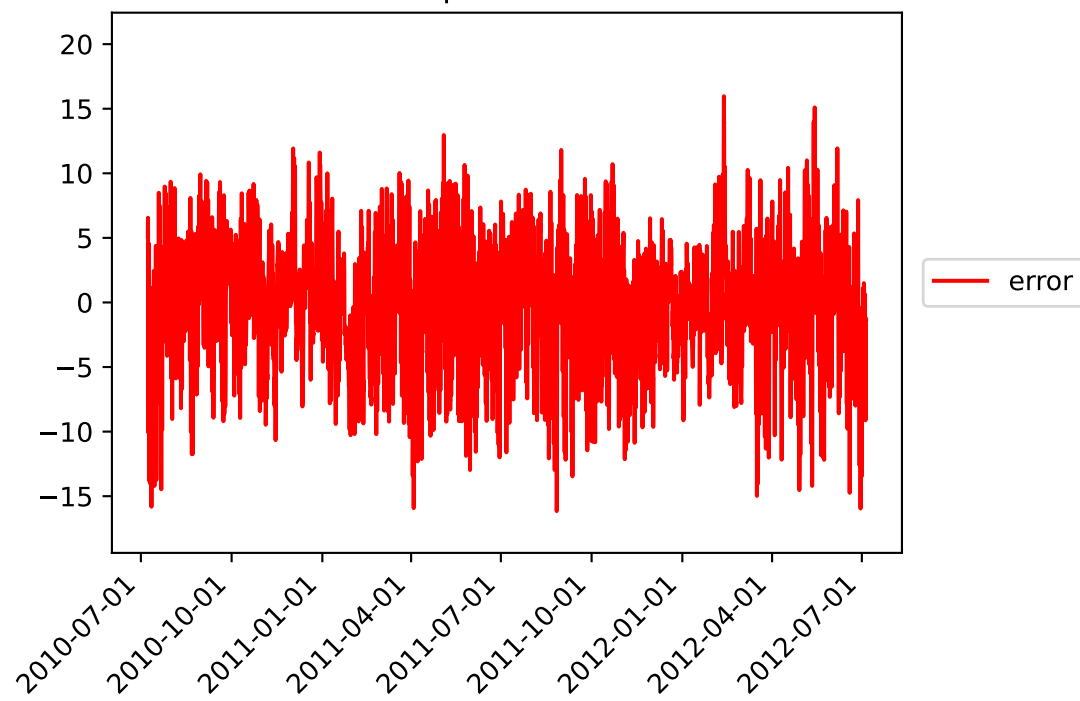

split: val

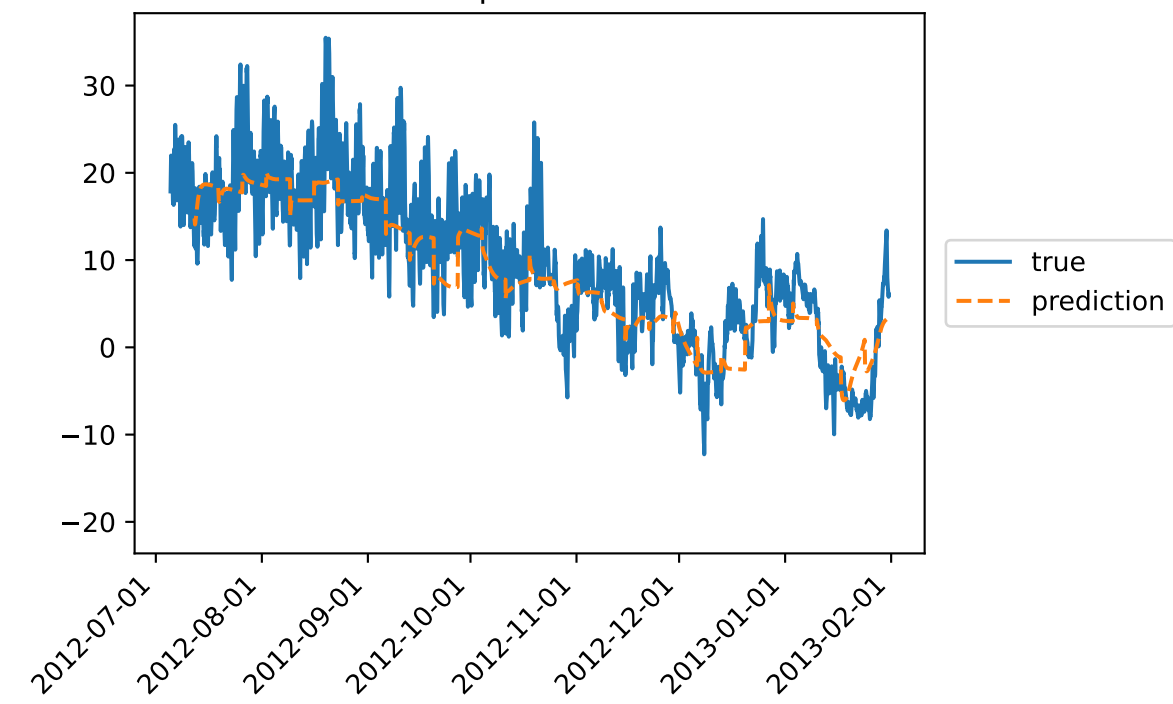

split: val

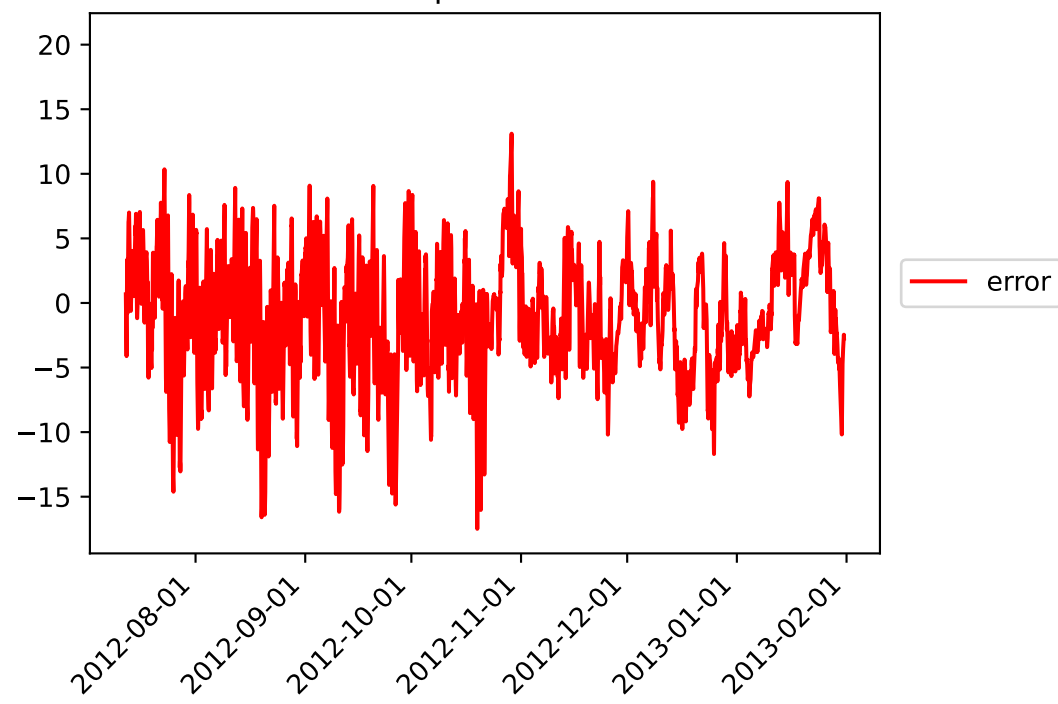

split: test

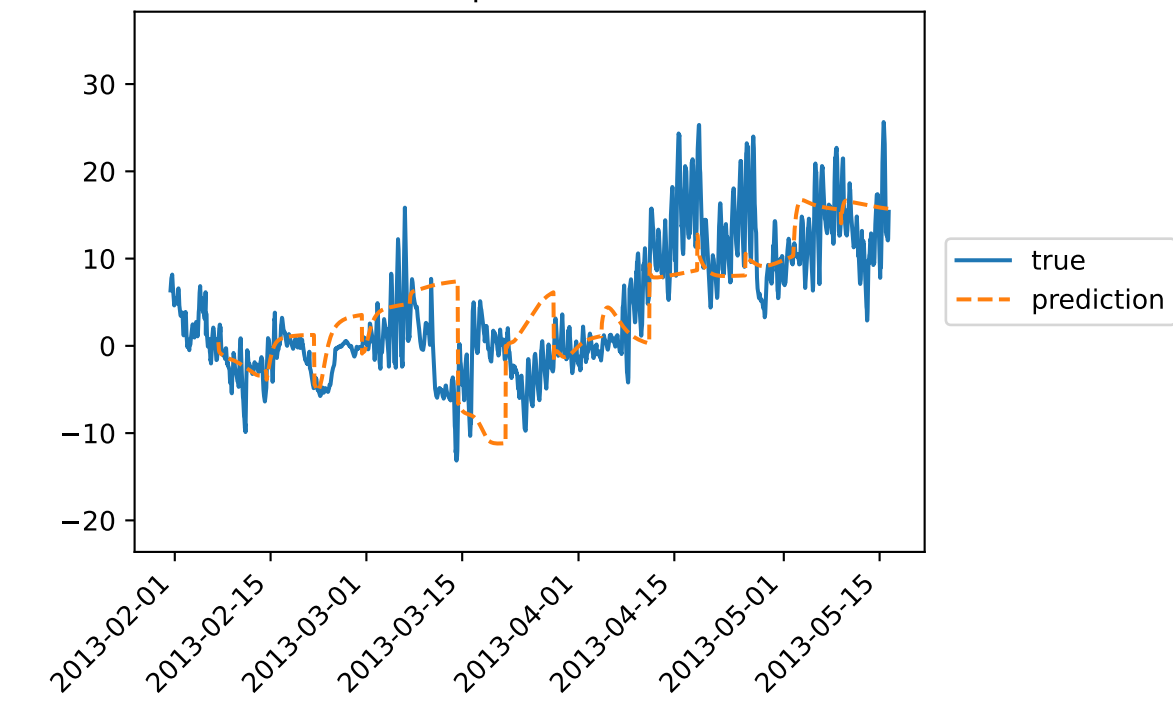

split: test

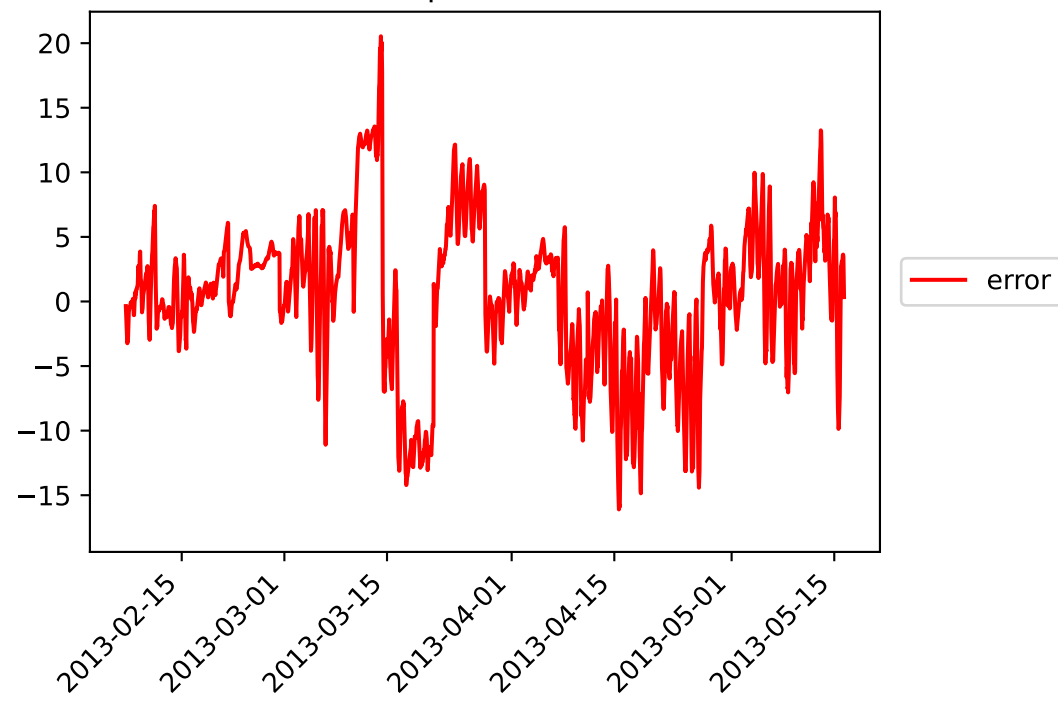

Supplement: supplementary_material [file attachment]

split: train

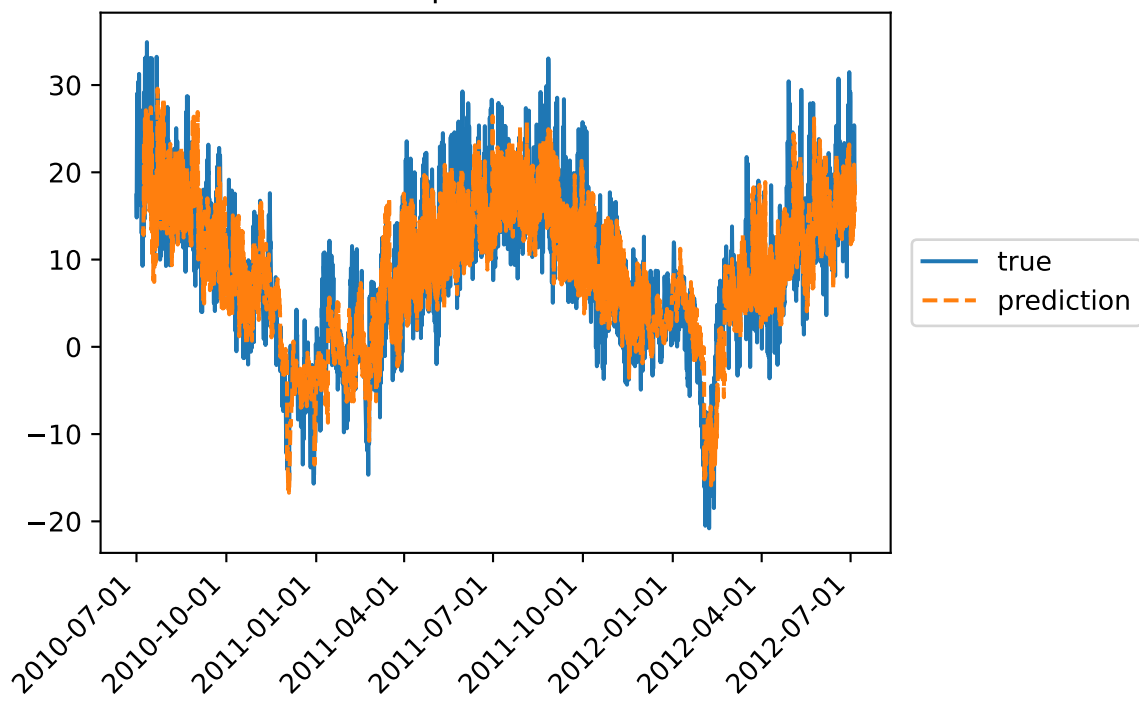

split: train

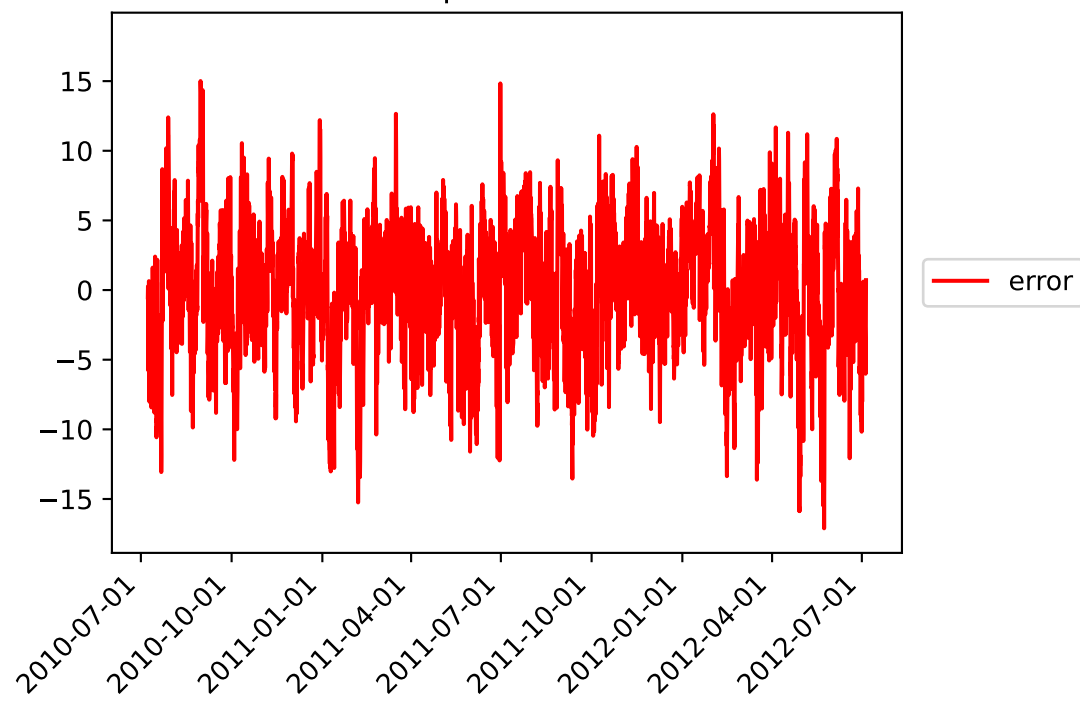

split: val

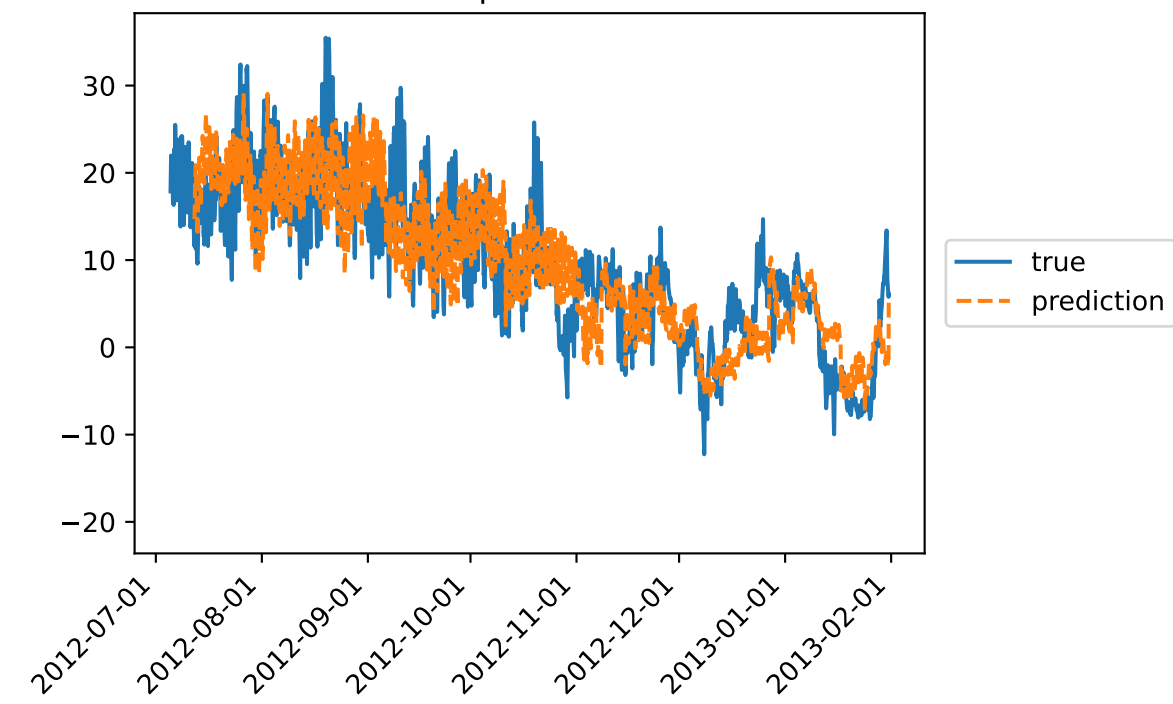

split: val

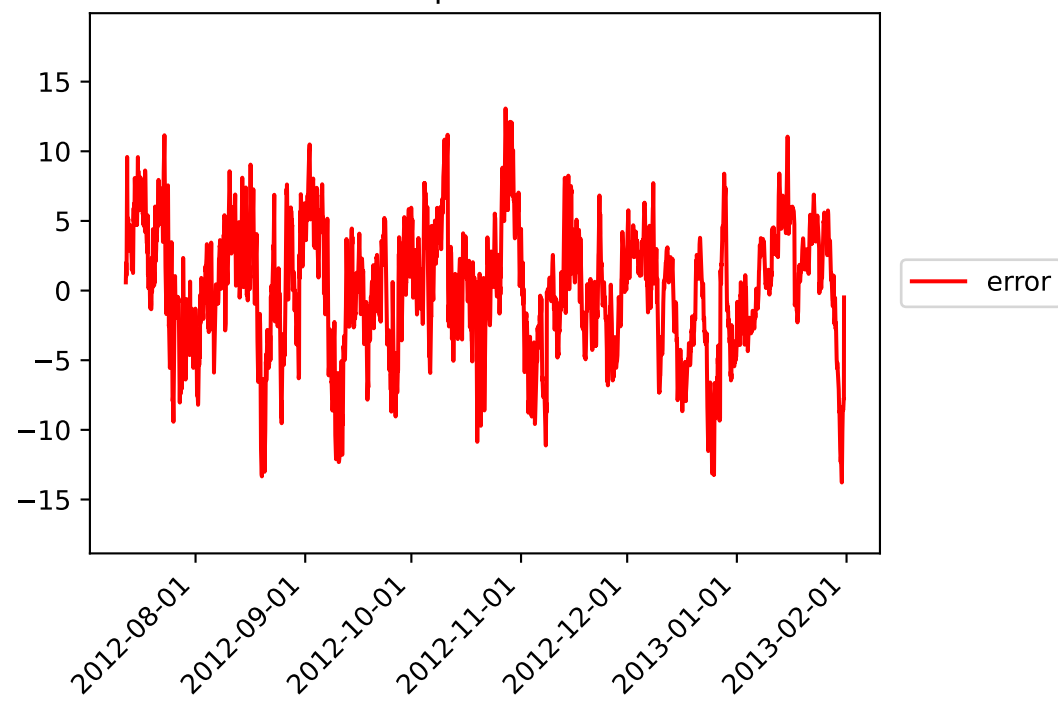

split: test

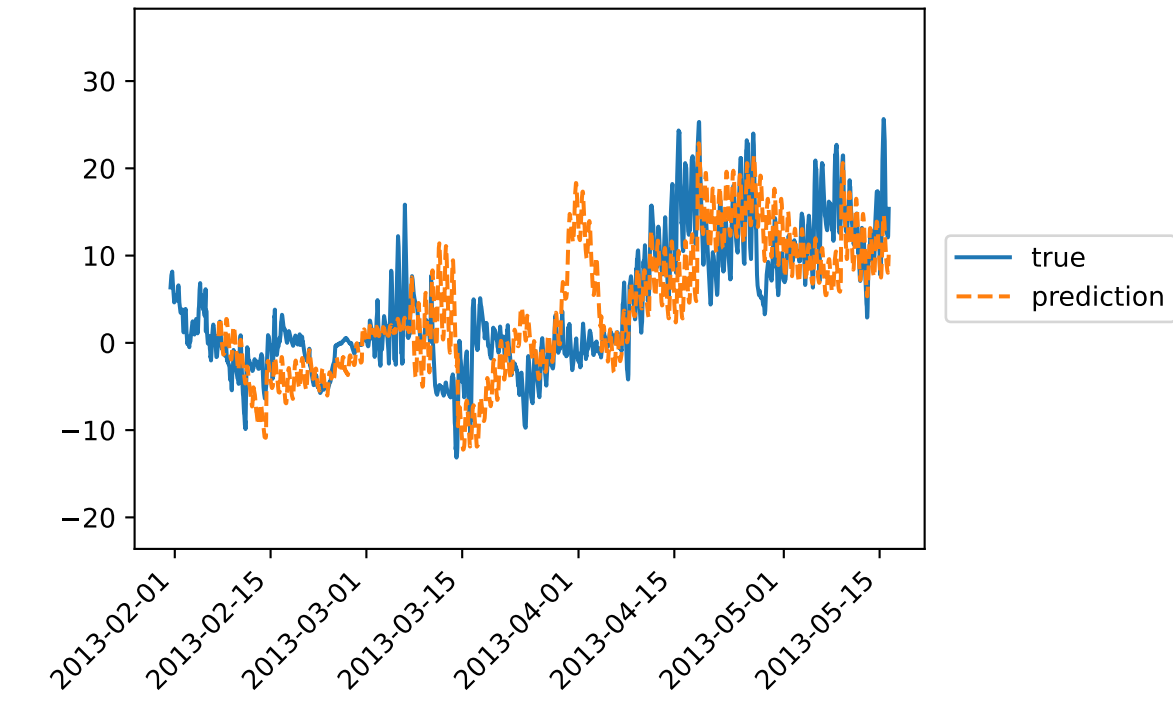

split: test

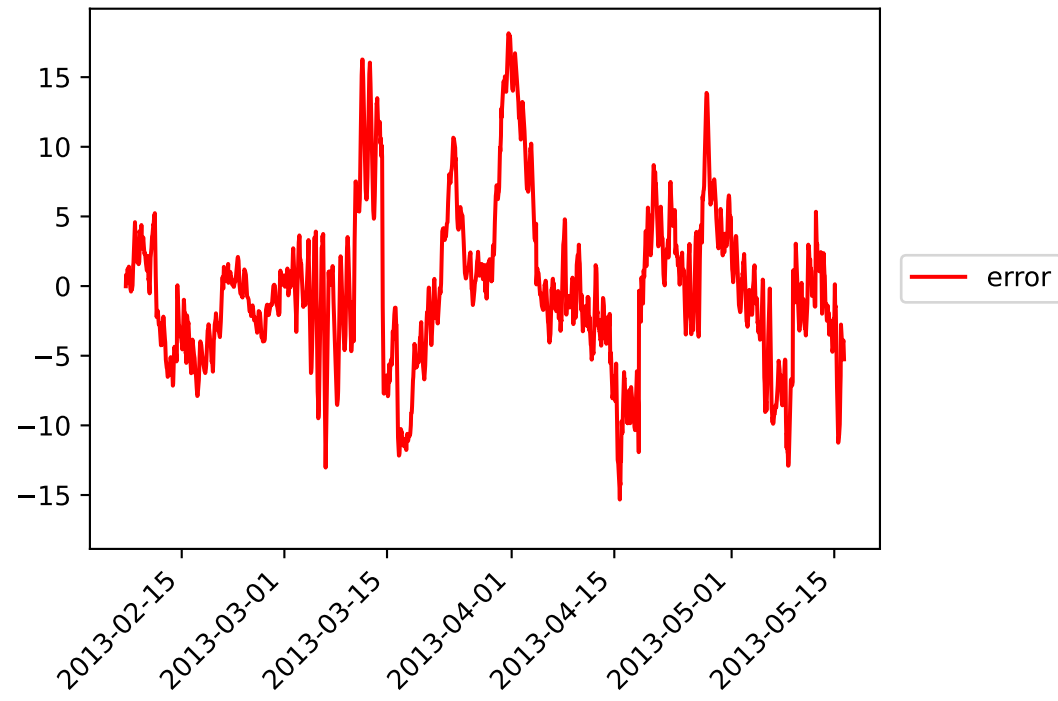

Supplement: supplementary_material [file attachment]

Dataset

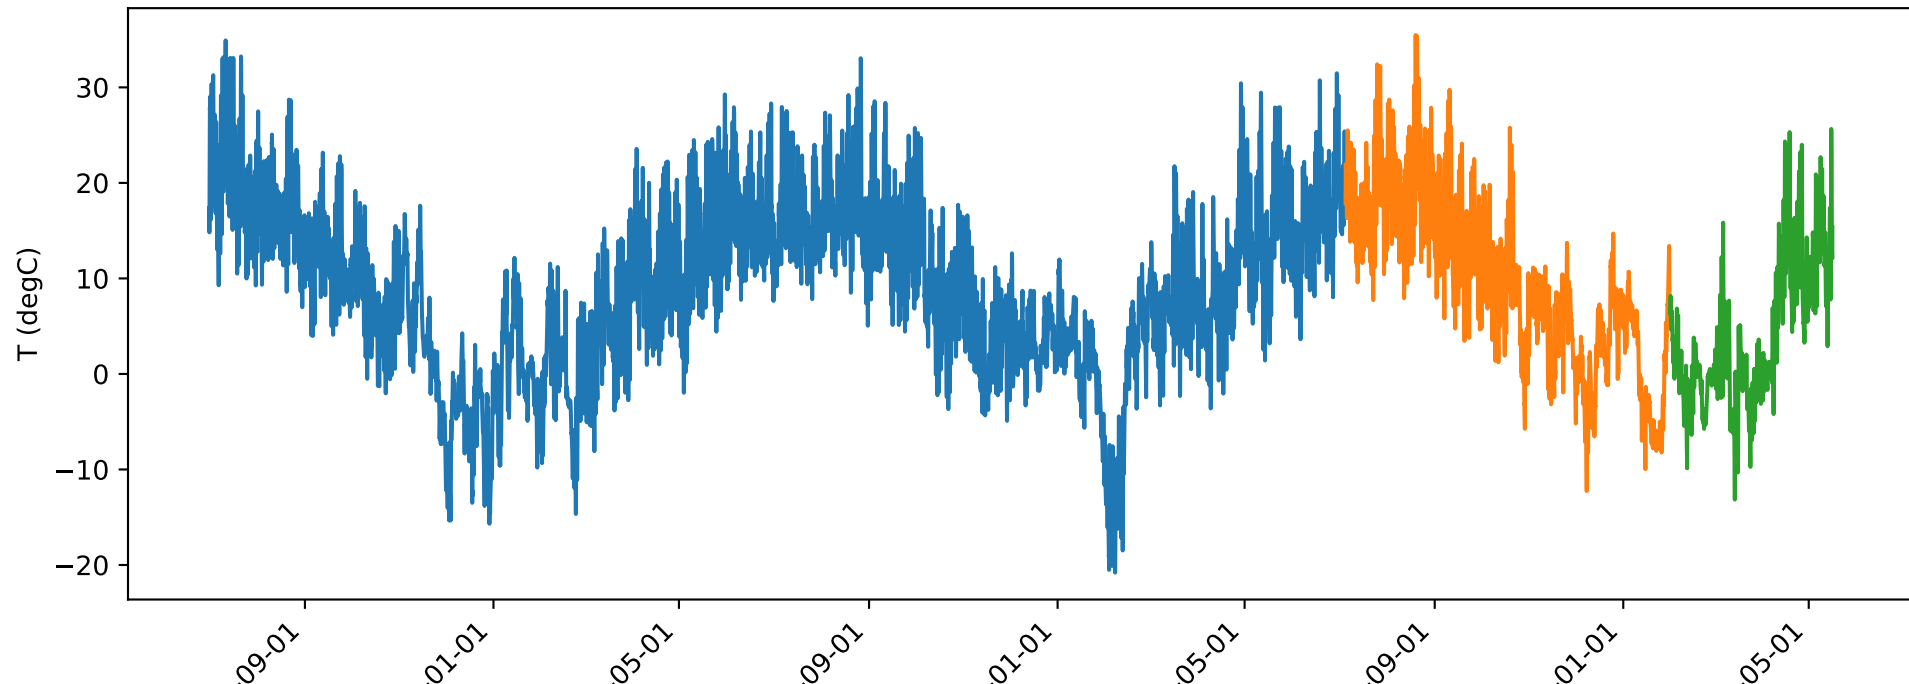

Supplement: supplementary_material [file attachment]

Sampling RNN

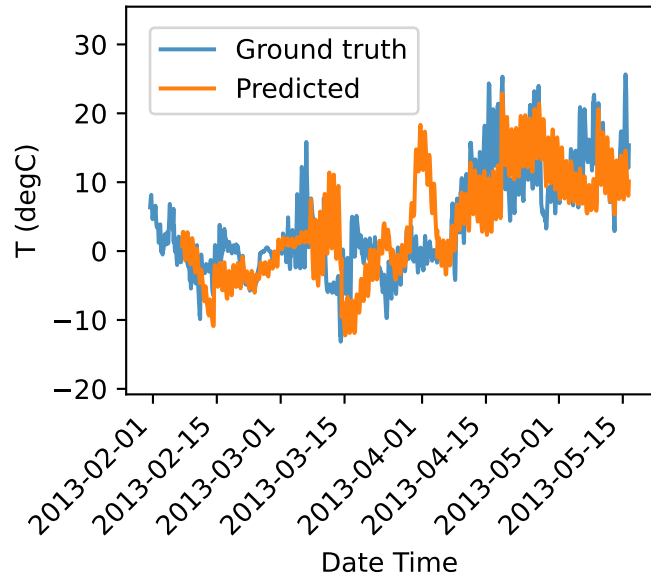

LSTM

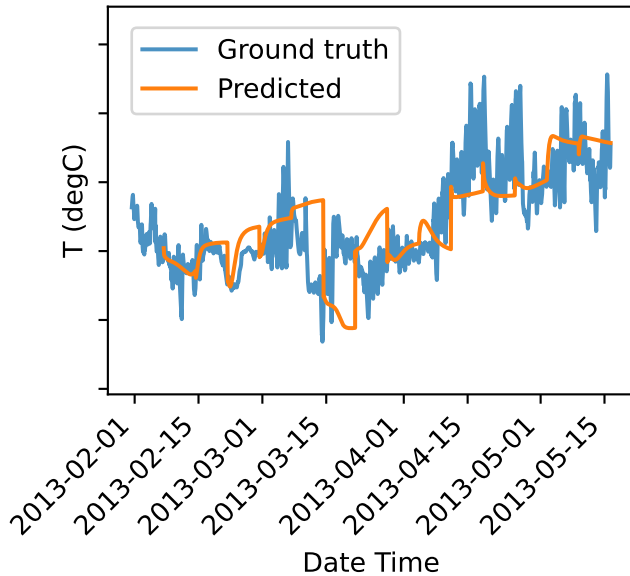

shPLRNN

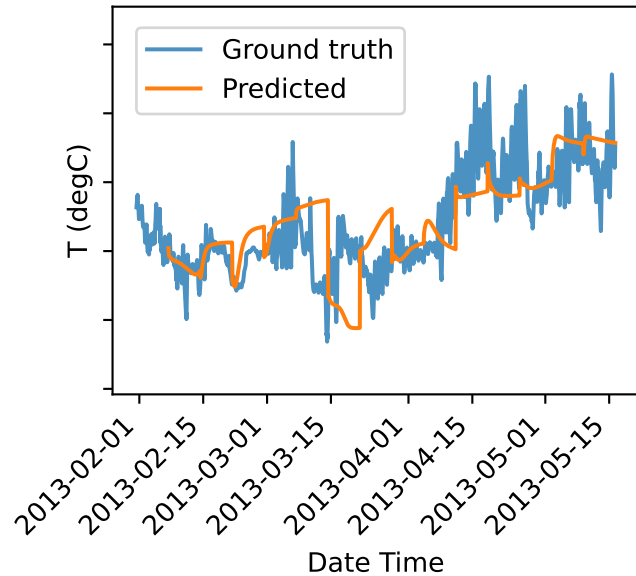

Supplement: supplementary_material [file attachment]
